# Supplementary material for: Assembly of the Mitochondrial Genome in the Campanulaceae Family Using Illumina Low-Coverage Sequencing
Source: MDPI journal article supplement (doi:10.3390/genes9080383), 2018-07-30
Supplement: s1 [file s1]

## Supplementary Tables

Supplementary Table S1. Overview of raw and trimmed data.

| Data type                          | <i>P. grandiflorus</i> | <i>C. lanceolata</i> |
|------------------------------------|------------------------|----------------------|
| Total raw data (reads)             | 138,425,472            | 26,721,308           |
| " (bases)                          | 20,902,246,272         | 8,043,113,708        |
| Used raw data (reads) <sup>1</sup> | 25,000,000             | 26,721,308           |
| " (bases) <sup>1</sup>             | 3,775,000,000          | 8,043,113,708        |
| Trimmed data (reads)               | 23,971,262             | 23,424,520           |
| " (bases)                          | 3,184,086,619          | 5,899,157,094        |
| Mapped reads <sup>2</sup>          | 673,914                | 403,704              |
| Average coverage                   | 79.05                  | 161.4                |

<sup>1</sup> Extracted from total raw data using manual method (Linux command line).

<sup>2</sup> Mitochondrial genome sequences were mapped by trimmed reads.

6 Supplementary Table S2. Comparison of four assemblers with two contig group.

| Category              |                      | <i>P. grandiflorus</i> |                   |           |                              | <i>C. lanceolata</i> |         |
|-----------------------|----------------------|------------------------|-------------------|-----------|------------------------------|----------------------|---------|
| Group                 | Type                 | Celera                 | SOAP <sup>1</sup> | SPAdes    | CLC(master<br>) <sup>2</sup> | CLC(minor<br>)       | CLC     |
| Initial <sup>3</sup>  | Number of contigs    | 132                    | 58                | 355       | 172                          |                      | 143     |
|                       | Total length (bp)    | 289,173                | 1,250,487         | 1,832,991 | 1,485,307                    |                      | 618,120 |
|                       | Longest contig (bp)  | 32,924                 | 158,662           | 99,337    | 134,690                      |                      | 85,287  |
|                       | Shortest contig (bp) | 1,010                  | 103               | 142       | 201                          |                      | 207     |
|                       | N50 <sup>5</sup>     | 2,176                  | 67,071            | 15,431    | 66,551                       |                      | 75,570  |
|                       | L50 <sup>6</sup>     | 38                     | 7                 | 21        | 8                            |                      | 4       |
| Utilized <sup>4</sup> | Number of contigs    | 3                      | 25                | 74        | 23                           | 22                   | 11      |
|                       | Total length (bp)    | 37,027                 | 1,192,214         | 1,223,031 | 1,193,802                    | 1,064,991            | 430,454 |
|                       | Longest contig (bp)  | 32,924                 | 158,662           | 99,337    | 158,819                      | 158,819              | 82,959  |
|                       | Shortest contig (bp) | 1,854                  | 3,832             | 1,055     | 3,347                        | 3,347                | 2,499   |
|                       | N50                  | 32,924                 | 67,322            | 37,830    | 105,769                      | 105,769              | 75,570  |
|                       | L50                  | 1                      | 6                 | 10        | 5                            | 4                    | 3       |

<sup>1</sup>SOAPdenovo assembler; <sup>2</sup>CLC novo assemble assembler; <sup>3</sup>Initial contigs of whole-genome; <sup>4</sup>Utilized contigs in the mitochondrial genome assembly; <sup>5</sup>Minimum contig length (bp) at 50% of the assembled genome; <sup>6</sup>Minimum number of contigs whose length sum equals N50.

12

Supplementary Table S3. Primers used for assembly validation.

| Primer no.    | Direction | Sequence (5'-3')         | Size (bp) | Location   | Locus                    |
|---------------|-----------|--------------------------|-----------|------------|--------------------------|
| Validation_01 | F         | CGAATAGGCCTTCTCCCTTC     | 991       | Intergenic | <i>trnF-GAA~mttB</i>     |
|               | R         | AAAAAGAGCAAAAGCCAG<br>CA |           |            |                          |
| Validation_02 | F         | GTTTGCCGGATTCAACAAC      | 969       | Intergenic | <i>rpl10~trnM-CAU</i>    |
|               | R         | GTGAGCGGGCAGAGTAAGT<br>C |           |            |                          |
| Validation_03 | F         | TAGAATAGGGCGGCTTGCT<br>A | 913       | Intergenic | <i>ccmFc~ccmB</i>        |
|               | R         | TAGGCAGCCTGGTCTTGACT     |           |            |                          |
| Validation_04 | F         | CCAGCCAAGAGGTTCTCAA<br>G | 995       | Intergenic | <i>trnH-GUG~ccmC</i>     |
|               | R         | GAATGAGTTCGCCTCTCAGG     |           |            |                          |
| Validation_05 | F         | GGCGCCAGGAAATACAGAT<br>A | 983       | Intergenic | <i>trnQ-UUG~trnW-CCA</i> |
|               | R         | AGGAAAGGTTGTGCCCTTTT     |           |            |                          |
| Validation_06 | F         | TCCTCCACTTCCTTCCCTCT     | 932       | Intergenic | <i>trnM-CAU~rps13</i>    |
|               | R         | AGGTCCCGGTCTTTGGTACT     |           |            |                          |
| Validation_07 | F         | GGTTGCGAAGCAAGAAAGT<br>C | 1,000     | Intergenic | <i>rps4~trnP-UGG</i>     |
|               | R         | CGTCCCAATACCTCGAAGA      |           |            |                          |
| Validation_08 | F         | AATGCCTAGCTTCCGTCTCA     | 906       | Intergenic | <i>atp6~ccmFn</i>        |
|               | R         | TTCTTCGGATTCCATCTTGG     |           |            |                          |
| Validation_09 | F         | ACTAGCCGTTGTGGTCATCC     | 925       | Intergenic | <i>rrn5~rrn26</i>        |
|               | R         | CGTGAGAAGGCCTAACTTC<br>G |           |            |                          |
| Validation_10 | F         | CCCGCACTAGTGAAGAGA<br>G  | 975       | Intergenic | <i>rps13~trnP-UGG</i>    |
|               | R         | GAGCCTTGGCAGTTGTTCTC     |           |            |                          |
| Validation_11 | F         | TGCCTAGCTAATTCGCACCT     | 900       | Intergenic | <i>atp8~atp4</i>         |
|               | R         | CCGGAGTCTTGAGTGAAGC      |           |            |                          |
| Validation_12 | F         | AGTTCGGCTTGGGTGATATG     | 966       | Intergenic | <i>trnY-GUA~trnP-UGG</i> |
|               | R         | AGTAGGCCGAGATGCTTTCA     |           |            |                          |

13

14

Supplementary Table S4. Features of assembled mitochondrial genomes of *P. grandiflorus* (including master and minor circle) and *C. lanceolata* with *H. annuus*.

| Compositional Categories                      | P. master <sup>1</sup> | P. minor <sup>2</sup> | C. lanceolata | H. annuus <sup>3</sup> |
|-----------------------------------------------|------------------------|-----------------------|---------------|------------------------|
| Genome length (bp)                            | 1,249,593              | 1,070,431             | 403,704       | 300,945                |
| GC contents (%)                               | 43.89                  | 41.99                 | 42.94         | 43.45                  |
| Total number of genes                         | 56                     | 42                    | 54            | 42                     |
| Duplicated genes                              | 10                     | 6                     | 7             | 0                      |
| Gene length sum (bp) <sup>4</sup>             | 40,368                 | 31,359                | 40,030        | 29,488                 |
| Gene length including duplicated genes (bp)   | 42,337                 | 31,840                | 40,544        | 29,488                 |
| Fraction of genome occupied by genes (%)      | 3.23                   | 2.93                  | 9.91          | 9.80                   |
| Fraction including duplicated genes (%)       | 3.39                   | 2.97                  | 10.04         | 9.80                   |
| Number of protein-coding genes                | 32                     | 23                    | 31            | 25                     |
| Total length of protein-coding sequences (bp) | 27,168                 | 18,306                | 28,042        | 22,560                 |
| Ratio of total protein-coding gene length (%) | 2.17                   | 1.17                  | 6.94          | 7.49                   |
| Average exon length (bp)                      | 603                    | 572                   | 596           | 867                    |
| Number of spliced protein-coding genes        | 3                      | 3                     | 3             | 0                      |
| Number of trans-spliced protein-coding genes  | 2                      | 1                     | 2             | 0                      |
| Number of non-spliced protein-coding genes    | 27                     | 19                    | 26            | 25                     |
| Number of transfer RNAs (tRNAs)               | 11                     | 10                    | 13            | 14                     |
| Number of ribosomal RNAs (rRNAs)              | 3                      | 3                     | 3             | 3                      |

<sup>1</sup>Master circle of mitochondrial genome in the *P. grandiflorus*.; <sup>2</sup>Minor circle of mitochondrial genome in the *P. grandiflorus*.; <sup>3</sup>Features of the mitochondrial genome of reported *Helianthus annuus*.<sup>19</sup>;

<sup>4</sup>Calculations include intron regions. For trans-spliced genes, only exons were included.

27  
28Supplementary Table S5. Repeat regions identified in the *P. grandiflorus* (including master and minor circle), *C. lanceolata* and *H. annuus*.

| No.                             | Length | First region    | Second region   | Direction | Location   | Locus                    |
|---------------------------------|--------|-----------------|-----------------|-----------|------------|--------------------------|
| <i>P. grandiflorus</i> (master) |        |                 |                 |           |            |                          |
| 1                               | 21,751 | 157411-179162   | 1227842-1249593 | Forward   | Intergenic | <i>rps4~trnP-UGG</i>     |
| 2                               | 3,827  | 7548-11375      | 617189-621016   | Forward   | Intergenic | <i>trnF-GAA~mttB</i>     |
| 3                               | 1,165  | 292904-294069   | 553231-554396   | Forward   | Intergenic | <i>atp6~ccmFn</i>        |
| 4                               | 812    | 393692-394504   | 666638-667450   | Forward   | Intergenic | <i>nad2~ccmFc</i>        |
| 5                               | 375    | 376633-377008   | 1146054-1146429 | Reverse   | Intergenic | <i>ccmFn~nad2</i>        |
| 6                               | 294    | 1050510-1050804 | 1220732-1221026 | Forward   | Intergenic | <i>nad1~trnP-UGG</i>     |
| 7                               | 283    | 310348-310631   | 1130016-1130299 | Reverse   | Intergenic | <i>atp6~ccmFn</i>        |
| 8                               | 262    | 113559-113821   | 552980-553242   | Forward   | Intergenic | <i>cox1~nad1</i>         |
| 9                               | 258    | 290486-290744   | 917521-917779   | Forward   | Intergenic | <i>atp6~ccmFn</i>        |
| 10                              | 168    | 636372-636540   | 840709-840877   | Forward   | Intergenic | <i>rps7~trnC-GCA</i>     |
| 11                              | 126    | 206419-206545   | 629276-629402   | Forward   | Intergenic | <i>trnM-CAU~atp6</i>     |
| 12                              | 119    | 7787-7906       | 284375-284494   | Reverse   | Intergenic | <i>trnF-GAA~mttB</i>     |
| 13                              | 119    | 284375-284494   | 617428-617547   | Reverse   | Intergenic | <i>atp6~ccmFn</i>        |
| 14                              | 115    | 852968-853083   | 911571-911686   | Reverse   | Intergenic | <i>rrn5~rrn26</i>        |
| 15                              | 113    | 29760-29873     | 629885-629998   | Forward   | Intergenic | <i>trnF-GAA~mttB</i>     |
| 16                              | 111    | 433932-434043   | 1123837-1123948 | Forward   | Intergenic | <i>cob~atp9</i>          |
| 17                              | 109    | 1149546-1149655 | 1200513-1200622 | Forward   | Intergenic | <i>atp8~atp4</i>         |
| 18                              | 103    | 263397-263500   | 773470-773573   | Forward   | Intergenic | <i>atp6~ccmFn</i>        |
| 19                              | 101    | 180385-180486   | 325390-325491   | Reverse   | Intergenic | <i>trnF-GAA~trnQ-UUG</i> |
| <i>P. grandiflorus</i> (minor)  |        |                 |                 |           |            |                          |
| 1                               | 1,165  | 113742-114907   | 374069-375234   | Forward   | Intergenic | <i>atp6~ccmFn</i>        |
| 2                               | 812    | 214530-215342   | 487476-488288   | Forward   | Intergenic | <i>nad2~ccmFc</i>        |
| 3                               | 375    | 197471-197846   | 966892-967267   | Reverse   | Intergenic | <i>ccmFn~nad2</i>        |
| 4                               | 294    | 871348-871642   | 1041570-1041864 | Forward   | Intergenic | <i>rps13~trnP-UGG</i>    |
| 5                               | 283    | 131186-131469   | 950854-951137   | Reverse   | Intergenic | <i>atp6~ccmFn</i>        |
| 6                               | 258    | 111324-111582   | 738359-738617   | Forward   | Intergenic | <i>atp6~ccmFn</i>        |
| 7                               | 168    | 457210-457378   | 661547-661715   | Forward   | Intergenic | <i>rps7~trnC-GCA</i>     |
| 8                               | 126    | 27257-27383     | 450114-450240   | Forward   | Intergenic | <i>trnM-CAU~atp6</i>     |
| 9                               | 119    | 105213-105332   | 438266-438385   | Reverse   | Intergenic | <i>atp6~ccmFn</i>        |
| 10                              | 115    | 673806-673921   | 732409-732524   | Reverse   | Intergenic | <i>rrn5~rrn26</i>        |
| 11                              | 111    | 254770-254881   | 944675-944786   | Forward   | Intergenic | <i>cob~atp9</i>          |
| 12                              | 109    | 970384-970493   | 1021351-1021460 | Forward   | Intergenic | <i>atp8~atp4</i>         |
| 13                              | 103    | 84235-84338     | 594308-594411   | Forward   | Intergenic | <i>atp6~ccmFn</i>        |
| 14                              | 101    | 1223-1324       | 146228-146329   | Reverse   | Intergenic | <i>trnF-GAA~trnQ-UUG</i> |

| <i>C. lanceolata</i> |       |               |               |         |            |                       |
|----------------------|-------|---------------|---------------|---------|------------|-----------------------|
| 1                    | 2,317 | 155885-158202 | 239401-241718 | Reverse | Intergenic | <i>cox1~trnM-CAU</i>  |
| 2                    | 705   | 80094-80799   | 317242-317947 | Reverse | Intergenic | <i>trnH-GUG~rrn18</i> |
| 3                    | 496   | 35230-35726   | 88389-88885   | Reverse | Intergenic | <i>nad5~ccmC</i>      |
| 4                    | 319   | 57769-58088   | 115663-115982 | Forward | Genic      | <i>cox2</i>           |
| 5                    | 282   | 51166-51448   | 272464-272746 | Forward | Intergenic | <i>trnF-GAA~cox2</i>  |
| 6                    | 230   | 101223-101453 | 157996-158226 | Forward | Intergenic | <i>rpl16~trnM-CAU</i> |
| 7                    | 206   | 101223-101429 | 239401-239607 | Reverse | Intergenic | <i>rpl16~trnM-CAU</i> |
| 8                    | 170   | 51599-51769   | 352153-352323 | Forward | Intergenic | <i>trnF-GAA~cox2</i>  |
| 9                    | 131   | 116655-116786 | 290160-290291 | Reverse | Intergenic | <i>nad6~nad1</i>      |
| 10                   | 112   | 126572-126684 | 367713-367825 | Reverse | Intergenic | <i>nad1~trnP-CGG</i>  |
| 11                   | 102   | 35348-35450   | 355994-356096 | Reverse | Intergenic | <i>nad5~ccmC</i>      |
| 12                   | 102   | 88665-88767   | 355994-356096 | Forward | Intergenic | <i>atp9~rps3</i>      |
| <i>H. annus</i>      |       |               |               |         |            |                       |
| 1                    | 5533  | 51681-57214   | 288011-293544 | Forward | Intergenic | <i>trnD~trnK</i>      |
| 2                    | 4347  | 57215-61562   | 293545-297892 | Forward | Intergenic | <i>trnD~trnK</i>      |
| 3                    | 2614  | 62000-64614   | 298331-300945 | Forward | Intergenic | <i>trnK~ccmB</i>      |
| 4                    | 722   | 36392-37114   | 189928-190650 | Forward | Genic      | <i>atp8</i>           |
| 5                    | 450   | 172459-172909 | 245601-246051 | Reverse | Intergenic | <i>trnS~cob</i>       |
| 6                    | 439   | 61566-62005   | 297898-298337 | Forward | Intergenic | <i>trnD~trnK</i>      |
| 7                    | 272   | 122001-122273 | 223609-223881 | Reverse | Genic      | <i>rps4</i>           |
| 8                    | 224   | 36539-36763   | 202672-202896 | Reverse | Intergenic | <i>nad4L~atp8</i>     |
| 9                    | 224   | 190075-190299 | 202672-202896 | Reverse | Intergenic | <i>cob~ccmFc</i>      |
| 10                   | 203   | 153070-153273 | 282999-283202 | Forward | Intergenic | <i>rps13~nad6</i>     |
| 11                   | 166   | 32211-32377   | 259635-259801 | Reverse | Intergenic | <i>nad4L~atp8</i>     |
| 12                   | 162   | 35511-35673   | 268977-269139 | Forward | Intergenic | <i>nad4L~atp8</i>     |
| 13                   | 153   | 149614-149767 | 284507-284660 | Reverse | Intergenic | <i>rps13~nad6</i>     |
| 14                   | 135   | 191176-191311 | 260792-260927 | Forward | Intergenic | <i>cob~ccmFc</i>      |
| 15                   | 124   | 35353-35477   | 268819-268943 | Forward | Intergenic | <i>nad4L~atp8</i>     |
| 16                   | 104   | 106127-106231 | 268924-269028 | Forward | Genic      | <i>coxI</i>           |

Supplementary Table S6. Tandem repeat sequences identified in the *P. grandiflorus* (including master and minor circle), *C. lanceolata* and *H. annuus*.

| No.                             | Position        | Consensus<br>size (bp) | Copy<br>number | Matches<br>(%) | Location   | Locus                               |
|---------------------------------|-----------------|------------------------|----------------|----------------|------------|-------------------------------------|
| <i>P. grandiflorus</i> (master) |                 |                        |                |                |            |                                     |
| 1                               | 8912-8952       | 18                     | 2              | 100            | Intergenic | <i>trnF</i> -GAA ~ <i>trnK</i> -UUU |
| 2                               | 136290-136325   | 18                     | 2              | 94             | Intergenic | <i>nad1</i> ~ <i>nad6</i>           |
| 3                               | 144290-144314   | 12                     | 2              | 100            | Intergenic | <i>rps4</i> ~ <i>trnP</i> -UGG      |
| 4                               | 238733-238763   | 15                     | 2              | 93             | Intergenic | <i>atp6</i> ~ <i>ccmFn</i>          |
| 5                               | 299800-299874   | 24                     | 3              | 71             | Intergenic | <i>atp6</i> ~ <i>ccmFn</i>          |
| 6                               | 352897-352942   | 23                     | 2              | 91             | Intergenic | <i>ccmFn</i> ~ CDS                  |
| 7                               | 454178-454223   | 20                     | 2              | 79             | Intergenic | <i>atp9</i> ~ CDS                   |
| 8                               | 534282-534321   | 21                     | 1              | 84             | Intergenic | <i>nad7</i> ~ <i>trnH</i> -GUG      |
| 9                               | 544270-544295   | 13                     | 2              | 100            | Intergenic | <i>nad7</i> ~ <i>trnH</i> -GUG      |
| 10                              | 564556-564605   | 25                     | 2              | 88             | Intergenic | <i>nad7</i> ~ <i>trnH</i> -GUG      |
| 11                              | 564558-564611   | 25                     | 2              | 82             | Intergenic | <i>nad7</i> ~ <i>trnH</i> -GUG      |
| 12                              | 581801-581827   | 13                     | 2              | 100            | Intergenic | <i>trnH</i> -GUG ~ <i>ccmC</i>      |
| 13                              | 618553-618593   | 18                     | 2              | 100            | Intergenic | <i>ccmC</i> ~ <i>rps7</i>           |
| 14                              | 636631-636659   | 14                     | 2              | 100            | Intergenic | <i>rps7</i> ~ <i>trnC</i> -GCA      |
| 15                              | 645888-645915   | 14                     | 2              | 100            | Intergenic | <i>rps7</i> ~ <i>trnC</i> -GCA      |
| 16                              | 687274-687298   | 12                     | 2              | 100            | Intergenic | <i>nad2</i> ~ <i>trnE</i> -UUC      |
| 17                              | 763642-763680   | 18                     | 2              | 86             | Intergenic | <i>trnQ</i> -UUG ~ <i>trnW</i> -CCA |
| 18                              | 878356-878406   | 21                     | 2              | 93             | Intergenic | <i>rrn5</i> ~ <i>rrn26</i>          |
| 19                              | 910965-910990   | 13                     | 2              | 100            | Intergenic | <i>rrn5</i> ~ <i>rrn26</i>          |
| 20                              | 932098-932131   | 17                     | 2              | 94             | Intergenic | <i>rrn5</i> ~ <i>rrn26</i>          |
| 21                              | 962293-962329   | 18                     | 2              | 94             | Intergenic | <i>rrn5</i> ~ <i>rrn26</i>          |
| 22                              | 1019361-1019390 | 15                     | 2              | 93             | Intergenic | <i>trnM</i> -CAU ~ <i>rps13</i>     |
| 23                              | 1046236-1046302 | 29                     | 2              | 100            | Intergenic | <i>rps13</i> ~ <i>nad1</i>          |
| 24                              | 1067143-1067177 | 17                     | 2              | 88             | Intergenic | <i>trnP</i> -UGG ~ <i>nad4</i>      |
| 25                              | 1074865-1074890 | 13                     | 2              | 100            | Intergenic | <i>trnP</i> -UGG ~ <i>nad4</i>      |
| 26                              | 1120590-1120615 | 13                     | 2              | 100            | Intergenic | <i>trnL</i> -CAA ~ <i>sdh4</i>      |
| 27                              | 1141484-1141509 | 13                     | 2              | 100            | Intergenic | <i>atp8</i> ~ <i>atp4</i>           |
| <i>P. grandiflorus</i> (minor)  |                 |                        |                |                |            |                                     |
| 1                               | 59571-59601     | 15                     | 2              | 93             | Intergenic | <i>atp6</i> ~ <i>ccmFn</i>          |
| 2                               | 120638-120712   | 24                     | 3              | 71             | Intergenic | <i>atp6</i> ~ <i>ccmFn</i>          |
| 3                               | 173735-173780   | 23                     | 2              | 91             | Intergenic | <i>ccmFn</i> ~ <i>nad2</i>          |
| 4                               | 275016-275061   | 20                     | 2              | 79             | Intergenic | <i>atp9</i> ~ <i>nad7</i>           |
| 5                               | 355120-355159   | 21                     | 1              | 84             | Intergenic | <i>nad7</i> ~ <i>trnH</i> -GUG      |
| 6                               | 365108-365133   | 13                     | 2              | 100            | Intergenic | <i>nad7</i> ~ <i>trnH</i> -GUG      |
| 7                               | 385394-385443   | 25                     | 2              | 88             | Intergenic | <i>nad7</i> ~ <i>trnH</i> -GUG      |
| 8                               | 385396-385449   | 25                     | 2              | 82             | Intergenic | <i>nad7</i> ~ <i>trnH</i> -GUG      |
| 9                               | 402639-402665   | 13                     | 2              | 100            | Intergenic | <i>trnH</i> -GUG~ <i>ccmC</i>       |

|                      |               |    |   |     |            |                          |
|----------------------|---------------|----|---|-----|------------|--------------------------|
| 10                   | 439391-439431 | 18 | 2 | 100 | Intergenic | <i>ccmC~rps7</i>         |
| 11                   | 457469-457497 | 14 | 2 | 100 | Intergenic | <i>rps7~trnC-GCA</i>     |
| 12                   | 466726-466753 | 14 | 2 | 100 | Intergenic | <i>rps7~trnC-GCA</i>     |
| 13                   | 508112-508136 | 12 | 2 | 100 | Intergenic | <i>nad2~trnE-UUC</i>     |
| 14                   | 584480-584518 | 18 | 2 | 86  | Intergenic | <i>trnQ-UUG~trnW-CCA</i> |
| 15                   | 699194-699244 | 21 | 2 | 93  | Intergenic | <i>rrn5~rrn26</i>        |
| 16                   | 731803-731828 | 13 | 2 | 100 | Intergenic | <i>rrn5~rrn26</i>        |
| 17                   | 752936-752969 | 17 | 2 | 94  | Intergenic | <i>rrn5~rrn26</i>        |
| 18                   | 783131-783167 | 18 | 2 | 94  | Intergenic | <i>rrn5~rrn26</i>        |
| 19                   | 840199-840228 | 15 | 2 | 93  | Intergenic | <i>trnM-CAU~rps13</i>    |
| 20                   | 867074-867140 | 29 | 2 | 100 | Intergenic | <i>rps13~trnP-UGG</i>    |
| 21                   | 887981-888015 | 18 | 2 | 88  | Intergenic | <i>trnP-UGG~nad4</i>     |
| 22                   | 895703-895728 | 13 | 2 | 100 | Intergenic | <i>trnP-UGG~nad4</i>     |
| 23                   | 941428-941453 | 13 | 2 | 100 | Intergenic | <i>trnL-CAA~sdh4</i>     |
| 24                   | 962322-962347 | 13 | 2 | 100 | Intergenic | <i>atp8~atp4</i>         |
| <i>C. lanceolata</i> |               |    |   |     |            |                          |
| 1                    | 30-60         | 16 | 2 | 93  | Intergenic | <i>nad5~trnE-UUC</i>     |
| 2                    | 7875-7906     | 15 | 2 | 94  | Intergenic | <i>trnE-UUC~nad5</i>     |
| 3                    | 13157-13191   | 17 | 2 | 100 | Intergenic | <i>trnE-UUC~nad5</i>     |
| 4                    | 26164-26235   | 22 | 3 | 62  | Intergenic | <i>trnE-UUC~nad5</i>     |
| 5                    | 26149-26250   | 48 | 2 | 98  | Intergenic | <i>trnE-UUC~nad5</i>     |
| 6                    | 31775-31815   | 21 | 2 | 85  | Intergenic | <i>nad5~ccmC</i>         |
| 7                    | 37597-37711   | 48 | 2 | 91  | Intergenic | <i>nad5~ccmC</i>         |
| 8                    | 45773-45851   | 39 | 2 | 95  | Intergenic | <i>trnF-GAA~cox2</i>     |
| 9                    | 56730-56771   | 21 | 2 | 90  | Intergenic | <i>trnF-GAA~cox2</i>     |
| 10                   | 57028-57069   | 8  | 5 | 81  | Intergenic | <i>trnF-GAA~cox2</i>     |
| 11                   | 57028-57069   | 15 | 2 | 80  | Intergenic | <i>trnF-GAA~cox2</i>     |
| 12                   | 57029-57070   | 21 | 2 | 86  | Intergenic | <i>trnF-GAA~cox2</i>     |
| 13                   | 57505-57578   | 18 | 4 | 91  | Intergenic | <i>trnF-GAA~cox2</i>     |
| 14                   | 62758-62785   | 14 | 2 | 100 | Intergenic | <i>cox2~cob</i>          |
| 15                   | 65201-65340   | 26 | 5 | 75  | Intergenic | <i>cob~nad1</i>          |
| 16                   | 65198-65346   | 52 | 2 | 84  | Intergenic | <i>cob~nad1</i>          |
| 17                   | 65728-65756   | 14 | 2 | 100 | Intergenic | <i>cob~nad1</i>          |
| 18                   | 71527-71560   | 17 | 2 | 100 | Intergenic | <i>cob~nad1</i>          |
| 19                   | 85852-85888   | 14 | 2 | 87  | Intergenic | <i>rrn5~atp9</i>         |
| 20                   | 85926-86004   | 38 | 2 | 88  | Intergenic | <i>rrn5~atp9</i>         |
| 21                   | 149477-149509 | 15 | 2 | 88  | Intergenic | <i>cox1~trnM-CAU</i>     |
| 22                   | 157953-157982 | 14 | 2 | 100 | Intergenic | <i>cox1~trnM-CAU</i>     |
| 23                   | 175386-175417 | 16 | 2 | 100 | Intergenic | <i>nad2~nad2</i>         |
| 24                   | 180102-180126 | 13 | 1 | 100 | Intergenic | <i>nad2~ccmFc</i>        |
| 25                   | 184102-184130 | 13 | 2 | 100 | Intergenic | <i>nad2~ccmFc</i>        |
| 26                   | 185366-185424 | 26 | 2 | 79  | Intergenic | <i>nad2~ccmFc</i>        |
| 27                   | 235289-235330 | 18 | 2 | 91  | Genic      | <i>rrn26</i>             |



|                  |               |    |   |     |            |                       |
|------------------|---------------|----|---|-----|------------|-----------------------|
| 28               | 236608-236637 | 14 | 2 | 93  | Intergenic | <i>rrn26~nad5</i>     |
| 29               | 239622-239651 | 14 | 2 | 100 | Intergenic | <i>trnM-CAU~rps12</i> |
| 30               | 285657-285694 | 19 | 2 | 94  | Intergenic | <i>trnF-GAA~rps7</i>  |
| 31               | 297320-297366 | 23 | 2 | 95  | Intergenic | <i>rps7~trnC-GCA</i>  |
| 32               | 341818-341842 | 13 | 1 | 100 | Intergenic | <i>atp6~nad7</i>      |
| <i>H. annuus</i> |               |    |   |     |            |                       |
| 1                | 6193-6232     | 9  | 4 | 87  | Intergenic | <i>trnY~trnN</i>      |
| 2                | 6187-6243     | 16 | 3 | 81  | Intergenic | <i>trnY~trnN</i>      |
| 3                | 10993-11028   | 7  | 5 | 93  | Intergenic | <i>trnC~ccmC</i>      |
| 4                | 10991-11028   | 12 | 3 | 88  | Intergenic | <i>trnC~ccmC</i>      |
| 5                | 10981-11028   | 18 | 2 | 90  | Intergenic | <i>trnC~ccmC</i>      |
| 6                | 23294-23318   | 12 | 2 | 100 | Intergenic | <i>ccmC~atp4</i>      |
| 7                | 42396-42421   | 7  | 3 | 100 | Intergenic | <i>coxIII~rpl5</i>    |
| 8                | 42397-42446   | 21 | 2 | 83  | Intergenic | <i>coxIII~rpl5</i>    |
| 9                | 42418-42447   | 15 | 2 | 93  | Intergenic | <i>coxIII~rpl5</i>    |
| 10               | 54941-54988   | 24 | 2 | 100 | Intergenic | <i>trnD~trnK</i>      |
| 11               | 55786-55832   | 20 | 2 | 92  | Intergenic | <i>trnD~trnK</i>      |
| 12               | 60607-60641   | 18 | 1 | 94  | Intergenic | <i>trnD~trnK</i>      |
| 13               | 61641-61686   | 21 | 2 | 96  | Intergenic | <i>trnD~trnK</i>      |
| 14               | 95812-95890   | 39 | 2 | 95  | Intergenic | <i>trnE~coxI</i>      |
| 15               | 108220-108265 | 24 | 1 | 86  | Intergenic | <i>coxI~nad5</i>      |
| 16               | 120658-120691 | 17 | 1 | 88  | Intergenic | <i>atp9~rps4</i>      |
| 17               | 129277-129459 | 46 | 4 | 98  | Genic      | <i>rrn26</i>          |
| 18               | 129278-129460 | 91 | 2 | 100 | Genic      | <i>rrn26</i>          |
| 19               | 131171-131213 | 18 | 2 | 81  | Genic      | <i>rrn26</i>          |
| 20               | 132823-132866 | 21 | 2 | 95  | Intergenic | <i>rrn26~rrn5</i>     |
| 21               | 159122-159155 | 17 | 2 | 100 | Intergenic | <i>rps13~nad6</i>     |
| 22               | 160575-160638 | 25 | 2 | 100 | Intergenic | <i>rps13~nad6</i>     |
| 23               | 168165-168204 | 20 | 2 | 100 | Intergenic | <i>rps13~nad6</i>     |
| 24               | 186296-186375 | 31 | 2 | 75  | Intergenic | <i>trnS~cob</i>       |
| 25               | 187081-187206 | 45 | 2 | 91  | Intergenic | <i>trnS~cob</i>       |
| 26               | 189708-189754 | 21 | 2 | 96  | Intergenic | <i>cob~ccmFc</i>      |
| 27               | 189720-189765 | 21 | 2 | 84  | Intergenic | <i>cob~ccmFc</i>      |
| 28               | 198748-198787 | 16 | 2 | 92  | Intergenic | <i>cob~ccmFc</i>      |
| 29               | 204820-204850 | 14 | 2 | 94  | Intergenic | <i>atp1~ccmFn</i>     |
| 30               | 208565-208621 | 22 | 2 | 97  | Intergenic | <i>atp1~ccmFn</i>     |
| 31               | 222470-222531 | 31 | 2 | 100 | Intergenic | <i>ccmFn~ccmFn</i>    |
| 32               | 233450-233489 | 18 | 2 | 86  | Intergenic | <i>rpl16~matR</i>     |
| 33               | 242359-242410 | 27 | 1 | 92  | Intergenic | <i>rpl16~matR</i>     |
| 34               | 271932-271984 | 24 | 2 | 100 | Intergenic | <i>atp6~trnK</i>      |
| 35               | 273281-273348 | 34 | 2 | 100 | Intergenic | <i>atp6~trnK</i>      |
| 36               | 273611-273681 | 35 | 2 | 100 | Intergenic | <i>atp6~trnK</i>      |
| 37               | 291271-291318 | 24 | 2 | 100 | Intergenic | <i>atp6~trnK</i>      |

|    |               |    |   |    |            |           |
|----|---------------|----|---|----|------------|-----------|
| 38 | 292116-292162 | 20 | 2 | 92 | Intergenic | atp6~trnK |
| 39 | 296937-296971 | 18 | 1 | 94 | Intergenic | atp6~trnK |
| 40 | 297973-298018 | 21 | 2 | 96 | Intergenic | atp6~trnK |

---
